# Supplementary material for: Optimal Budget Allocation Across Search Advertising Markets
Source: Atypon-hosted journal article supplement (doi:10.1287/ijoc.2014.0626), 2015-04-01
Supplement: ijoc.2014.0626-sm-yang-budget-final_20141001-onlinesupplement.pdf [file ijoc.2014.0626-sm-yang-budget-final_20141001-onlinesupplement.pdf]

# Online Supplement for “Optimal Budget Allocation across Search Advertising Markets”

Yanwu Yang<sup>1</sup>, Daniel Zeng<sup>2,4</sup>, Yinghui Yang<sup>3</sup>, Jie Zhang<sup>4</sup>

<sup>1</sup>School of Management, Huazhong University of Science and Technology, Wuhan 430074, China

<sup>2</sup>Department of Management Information Systems, University of Arizona, USA

<sup>3</sup>Graduate School of Management, University of California, Davis, USA

<sup>4</sup>Institute of Automation, Chinese Academy of Sciences, Beijing 100190, China

yangyanwu.isec@gmail.com

## Appendix A: Proof of Theorem 1 and Theorem 2

*Proof.* In order to solve the constrained optimization problem with constraint  $\sum_i \int_0^T e^{-rt} b_i(t) dt \leq B$ , we introduce a Lagrange multiplier  $\lambda \geq 0$ . Suppose  $C_i(t)$ ,  $q_i(t)$  and  $\alpha_i(t)$  are all continuous differentiable functions. Starting with a pair of initial market shares with random values  $(y_1, y_2) \in [0, 1] \times [0, 1]$  at time  $t$ , we define the value function  $V_\lambda(t, y_1, y_2)$  to be the maximal payoff we can obtain during time interval  $[t, T]$ . That is,

$$V_\lambda(t, y_1, y_2) := \sup_{b_1(\cdot) \geq 0, b_2(\cdot) \geq 0} \int_t^T e^{-rs} \{C_1(s)\theta_1(s) + C_2(s)\theta_2(s) - b_1(s) - b_2(s) - \lambda(b_1(s) + b_2(s))\} ds,$$

where we set  $C_i(t) = v_i(t)m_i(t)c_i(t)$  for simplicity.

Notice that for any pair of  $(y_1, y_2) \in [0, 1] \times [0, 1]$ ,  $V_\lambda(T, y_1, y_2) = 0$ . Following the principle of

dynamic programming, we have the Hamilton-Jacobi-Bellman equation:

$$\begin{aligned}
0 = & V_{\lambda,t} + \max_{\{b_1 \geq 0, b_2 \geq 0\}} \{ \rho_1 q_1 (b_1)^{\alpha_1} \sqrt{1 - \theta_1} \cdot V_{\lambda, \theta_1} \\
& + \rho_2 q_2 (b_2)^{\alpha_2} \sqrt{1 - \theta_2} \cdot V_{\lambda, \theta_2} \\
& + e^{-rt} (C_1 \theta_1 + C_2 \theta_2 - (1 + \lambda)(b_1 + b_2)) \}
\end{aligned} \tag{1}$$

Differentiating (1), we obtain the optimal feedback advertising decision:

$$\begin{aligned}
b_1 &= \left( \frac{(1+\lambda)e^{-rt}}{\rho_1 q_1 \alpha_1 \sqrt{1-\theta_1} V_{\lambda, \theta_1}} \right)^{1/(\alpha_1-1)}, \\
b_2 &= \left( \frac{(1+\lambda)e^{-rt}}{\rho_2 q_2 \alpha_2 \sqrt{1-\theta_2} V_{\lambda, \theta_2}} \right)^{1/(\alpha_2-1)}
\end{aligned} \tag{2}$$

Substituting (2) into (1), we obtain the Hamilton-Jacobi equation:

$$\begin{aligned}
& V_{\lambda,t} \\
& + (1 - \alpha_1) \left( e^{rt} \frac{\alpha_1}{1 + \lambda} \right)^{\frac{\alpha_1}{1-\alpha_1}} (\rho_1 q_1 \sqrt{1 - \theta_1} V_{\lambda, \theta_1})^{\frac{1}{1-\alpha_1}} \\
& + (1 - \alpha_2) \left( e^{rt} \frac{\alpha_2}{1 + \lambda} \right)^{\frac{\alpha_2}{1-\alpha_2}} (\rho_2 q_2 \sqrt{1 - \theta_2} V_{\lambda, \theta_2})^{\frac{1}{1-\alpha_2}} \\
& + e^{-rt} (C_1 \theta_1 + C_2 \theta_2) = 0.
\end{aligned} \tag{3}$$

Solve (3) with the terminal value condition  $V_{\lambda}(T, \theta_1, \theta_2) = 0$ , we get  $V_{\lambda}(t, \theta_1, \theta_2)$ . Put it into (2), then we can obtain the optimal budget allocation strategy:  $b_{\lambda,1}^*(t, \theta_1, \theta_2), b_{\lambda,2}^*(t, \theta_1, \theta_2)$ .

Now let us determine the constant  $\lambda$ . Because

$$\lambda \left( B - \int_0^T e^{-rt} (b_{\lambda,1}^*(t, \theta_1, \theta_2) + b_{\lambda,2}^*(t, \theta_1, \theta_2)) dt \right) = 0 \tag{4}$$

If

$$\int_0^T e^{-rt} (b_{0,1}^*(t, \theta_1, \theta_2) + b_{0,2}^*(t, \theta_1, \theta_2)) dt \leq B,$$

where we set  $\lambda = 0$ . Note that this is the case when the advertising budget is sufficient or unlimited. Then

let us consider the case with the limited budget. That is,

$$\int_0^T e^{-rt} (b_{0,1}^*(t, \theta_1, \theta_2) + b_{0,2}^*(t, \theta_1, \theta_2)) dt > B,$$

We set the minimal  $\lambda > 0$ , then

$$\int_0^T e^{-rt} (b_{\lambda,1}^*(t, \theta_1, \theta_2) + b_{\lambda,2}^*(t, \theta_1, \theta_2)) dt = B. \quad (5)$$

The choice of the control variables  $b_1$  and  $b_2$  depends on the value of  $\lambda$ . Given a fixed  $\lambda$  we denote the optimal control solution with  $b_{\lambda,1}^*$  and  $b_{\lambda,2}^*$ . Therefore, the choice of  $\lambda$  together with correspondent optimal budget allocation strategy  $(b_{\lambda,1}^*(t, \theta_1, \theta_2), b_{\lambda,2}^*(t, \theta_1, \theta_2))$  provides a theoretical solution for model (3).  $\square$

## Appendix B: Proof of Corollary 1

*Proof.* From (2), we always have the following equality:

$$\begin{aligned} & \rho_1 q_1 \alpha_1 (b_1^*)^{\alpha_1 - 1} \sqrt{1 - \theta_1^*} V_{\theta_1^*} \\ &= \rho_2 q_2 \alpha_2 (b_2^*)^{\alpha_2 - 1} \sqrt{1 - \theta_2^*} V_{\theta_2^*} \\ &= e^{-rt} (1 + \lambda). \end{aligned}$$

Rewrite the above equality as:

$$V_{\theta_1^*} \frac{d\theta_1^*}{dt} \frac{\alpha_1(t)}{b_1^*(t)} = V_{\theta_2^*} \frac{d\theta_2^*}{dt} \frac{\alpha_2(t)}{b_2^*(t)} = e^{-rt} (1 + \lambda).$$

$\square$

## Appendix C: Proof of Theorem 3

*Proof.* Let  $(b_1^*(t), b_2^*(t))$  be the optimal budget allocation strategy for model (5). Thus,

$$\int_0^T e^{-rt} (b_1^*(t) + b_2^*(t)) dt = R^*(0) - R^*(T) \leq B,$$

$$d\theta_1^*/dt = \rho_1 q_1 (b_1^*)^{\alpha_1(t)} \sqrt{1 - \theta_1^*},$$

$$d\theta_2^*/dt = \rho_2 q_2 (b_2^*)^{\alpha_2(t)} \sqrt{1 - \theta_2^*},$$

and  $b_i^*(t) \geq 0$ .

Let  $(\tilde{b}_1(t), \tilde{b}_2(t))$  be the optimal budget allocation strategy for model (3), and  $\tilde{\lambda}$  be the corresponding Lagrange multiplier. By the definition of ‘‘optimum’’, we get

$$\begin{aligned} & \int_0^T e^{-rt} \{C_1(t)\tilde{\theta}_1(t) - \tilde{b}_1(t) \\ & \quad + C_2(t)\tilde{\theta}_2(t) - \tilde{b}_2(t) - \tilde{\lambda}(\tilde{b}_1(t) + \tilde{b}_2(t))\} dt \\ & \geq \int_0^T e^{-rt} \{C_1(t)\theta_1^*(t) - b_1^*(t) \\ & \quad + C_2(t)\theta_2^*(t) - b_2^*(t) - \tilde{\lambda}(b_1^*(t) + b_2^*(t))\} dt, \end{aligned} \quad (6)$$

and

$$\begin{aligned} & \int_0^T e^{-rt} \{C_1(t)\tilde{\theta}_1(t) - \tilde{b}_1(t) + C_2(t)\tilde{\theta}_2(t) - \tilde{b}_2(t)\} dt \\ & \leq \int_0^T e^{-rt} \{C_1(t)\theta_1^*(t) - b_1^*(t) + C_2(t)\theta_2^*(t) - b_2^*(t)\} dt. \end{aligned} \quad (7)$$

(i) On the one hand, comparing (6) with (7), we have

$$\begin{aligned} & \tilde{\lambda} \int_0^T e^{-rt} (\tilde{b}_1(t) + \tilde{b}_2(t)) dt \\ & \leq \tilde{\lambda} \int_0^T e^{-rt} (b_1^*(t) + b_2^*(t)) dt \leq \tilde{\lambda} B. \end{aligned} \quad (8)$$

If  $\tilde{\lambda} = 0$ , then

$$\begin{aligned} & \int_0^T e^{-rt} \{C_1(t)\tilde{\theta}_1(t) - \tilde{b}_1(t) + C_2(t)\tilde{\theta}_2(t) - \tilde{b}_2(t)\} dt \\ & = \int_0^T e^{-rt} \{C_1(t)\theta_1^*(t) - b_1^*(t) + C_2(t)\theta_2^*(t) - b_2^*(t)\} dt. \end{aligned}$$

This proves that  $(b_1^*(t), b_2^*(t))$  is also the optimal budget allocation strategy for model (3).

If  $\tilde{\lambda} \neq 0$ , from (8), we get  $\int_0^T e^{-rt}(\tilde{b}_1(t) + \tilde{b}_2(t))dt \leq B$ . Following the method for determining  $\lambda$  in (5),  $\tilde{\lambda} = 0$ , which contradicts  $\tilde{\lambda} \neq 0$ . Therefore, the optimal budget allocation strategy of model (5) is also the optimal budget allocation strategy of model (3).

(ii) On the other hand, we can show that  $(\tilde{b}_1(t), \tilde{b}_2(t))$  is also the optimal budget allocation strategy for model (5) as well.

If  $\tilde{\lambda} = 0$ , then

$$\begin{aligned} & \int_0^T e^{-rt} \{C_1(t)\tilde{\theta}_1(t) - \tilde{b}_1(t) + C_2(t)\tilde{\theta}_2(t) - \tilde{b}_2(t)\} dt \\ &= \int_0^T e^{-rt} \{C_1(t)\theta_1^*(t) - b_1^*(t) + C_2(t)\theta_2^*(t) - b_2^*(t)\} dt. \end{aligned}$$

Thus,  $(\tilde{b}_1(t), \tilde{b}_2(t))$  is also the optimal budget allocation strategy for model (5).

If  $\tilde{\lambda} > 0$ , then  $\int_0^T e^{-rt}(\tilde{b}_1(t) + \tilde{b}_2(t))dt = B$ .

$$\begin{aligned} & -\tilde{\lambda} \int_0^T e^{-rt}(\tilde{b}_1(t) + \tilde{b}_2(t))dt \\ & \leq -\tilde{\lambda} \int_0^T e^{-rt}(b_1^*(t) + b_2^*(t))dt. \end{aligned}$$

Using (6), we get

$$\begin{aligned} & \int_0^T e^{-rt} \{C_1(t)\tilde{\theta}_1(t) - \tilde{b}_1(t) + C_2(t)\tilde{\theta}_2(t) - \tilde{b}_2(t)\} dt \\ & \geq \int_0^T e^{-rt} \{C_1(t)\theta_1^*(t) - b_1^*(t) + C_2(t)\theta_2^*(t) - b_2^*(t)\} dt, \end{aligned}$$

which implies that  $(\tilde{b}_1(t), \tilde{b}_2(t))$  is also the optimal budget allocation strategy for model (5).

Therefore, the optimization problem (3) is equivalent to the optimization problem (5). □
